# Supplementary material for: NOD2 reduces the chemoresistance of melanoma by inhibiting the TYMS/PLK1 signaling axis
Source: PubMed Central journal article supplement (PMC11445241; doi:10.1038/s41419-024-07104-8), 2024-10-01

Figure 1E

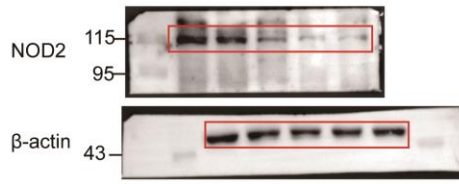

Figure 1F

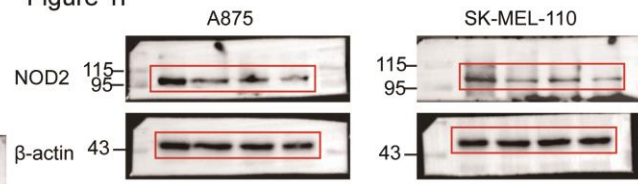

Figure 1G

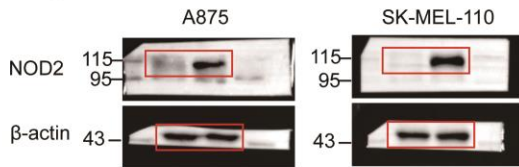

Figure 2F

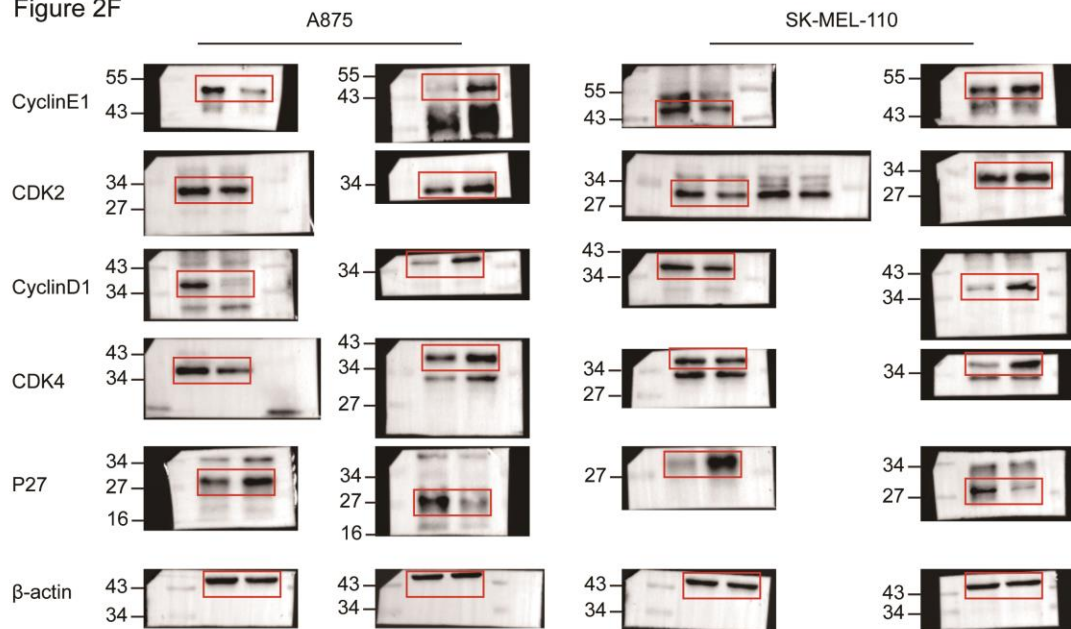

Figure 3C

A875

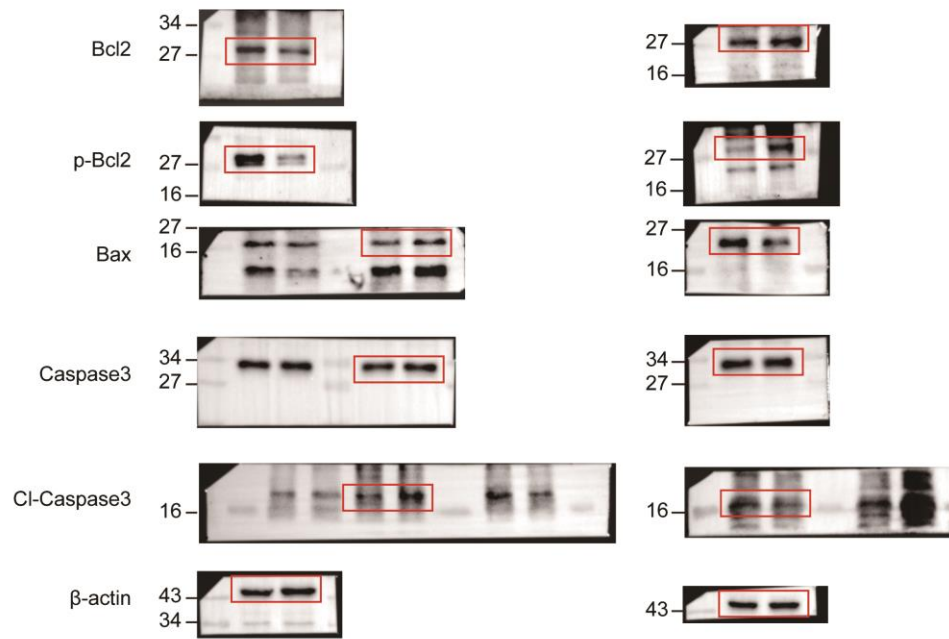

SK-MEL-110

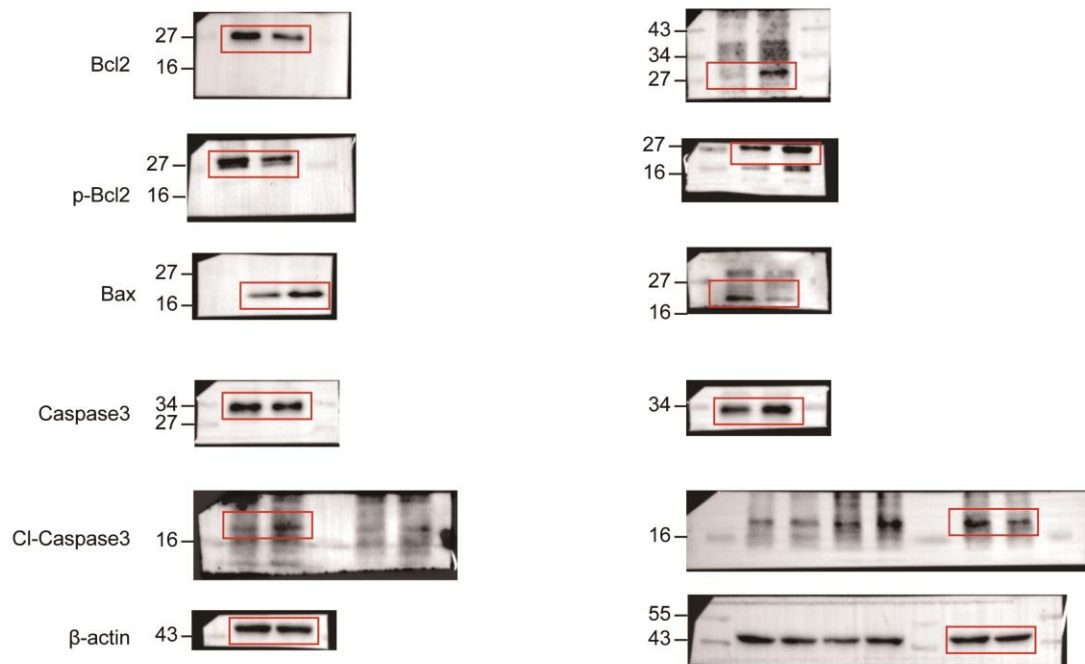

Figure 4D

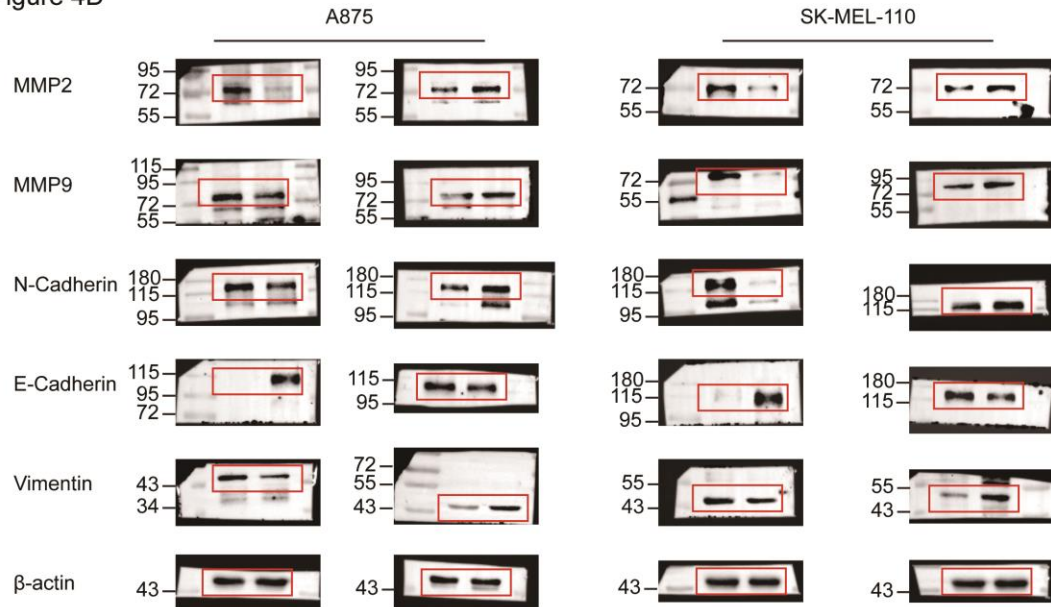

Figure 5G

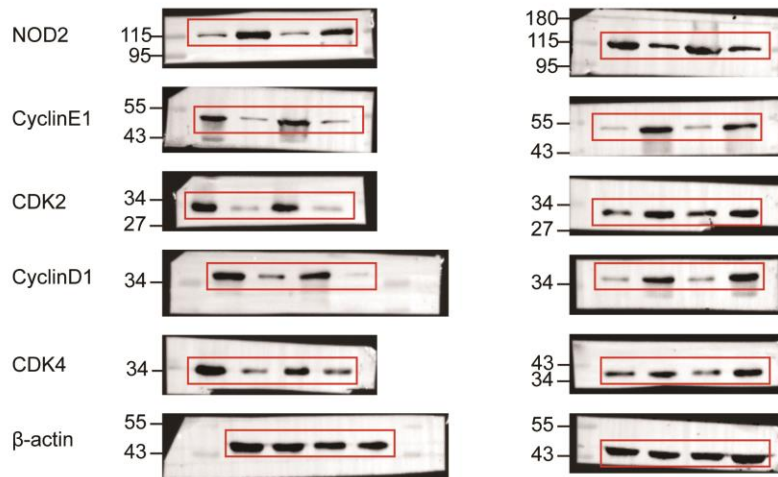

Figure 6G

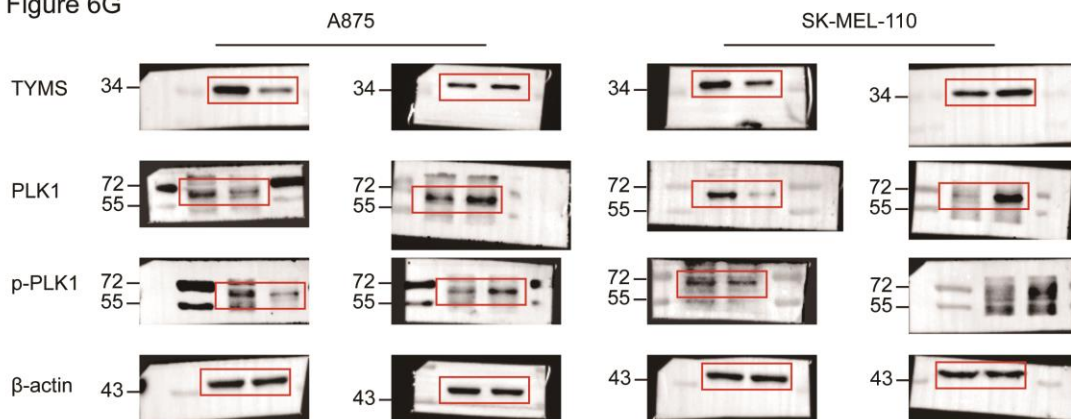

Figure 7A

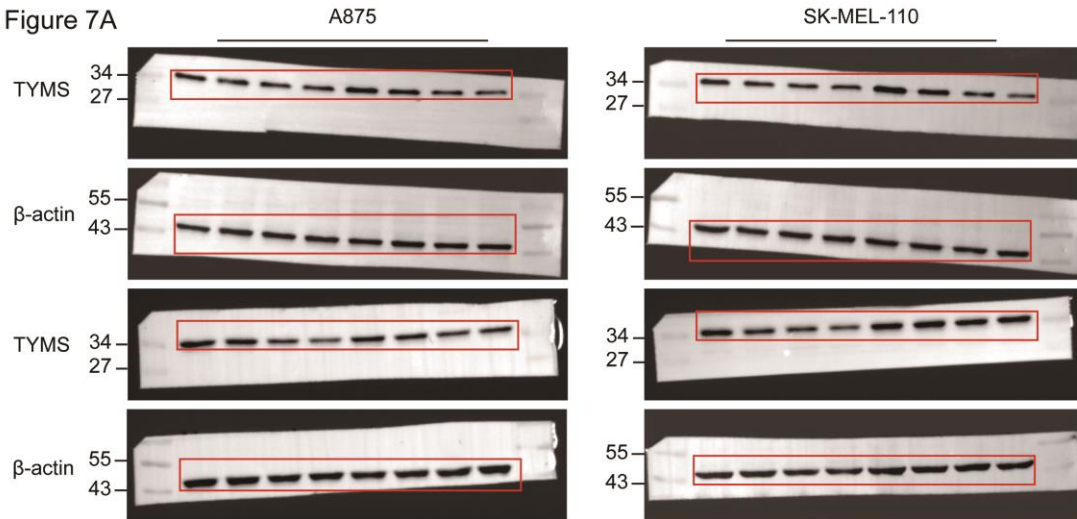

Figure 7B

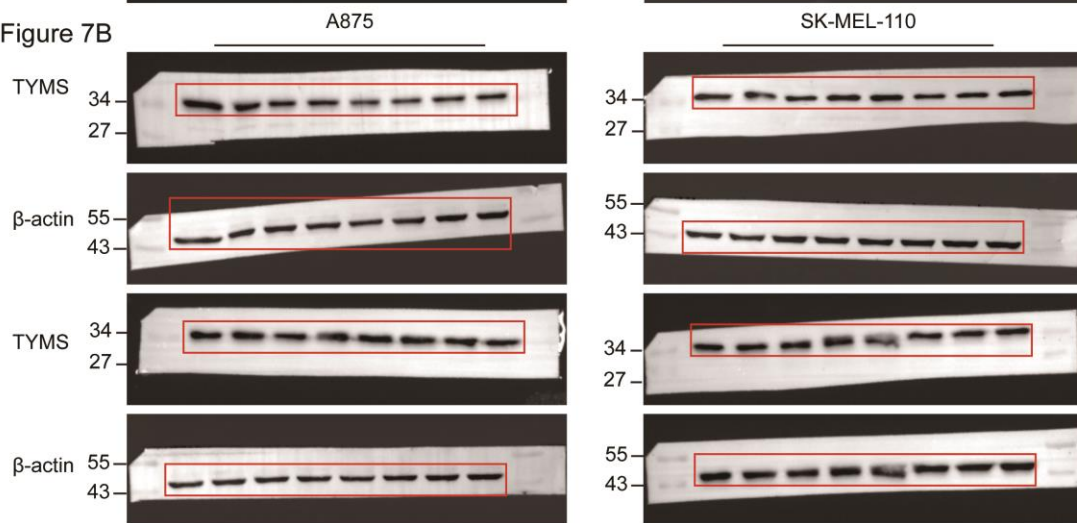

Figure 7C

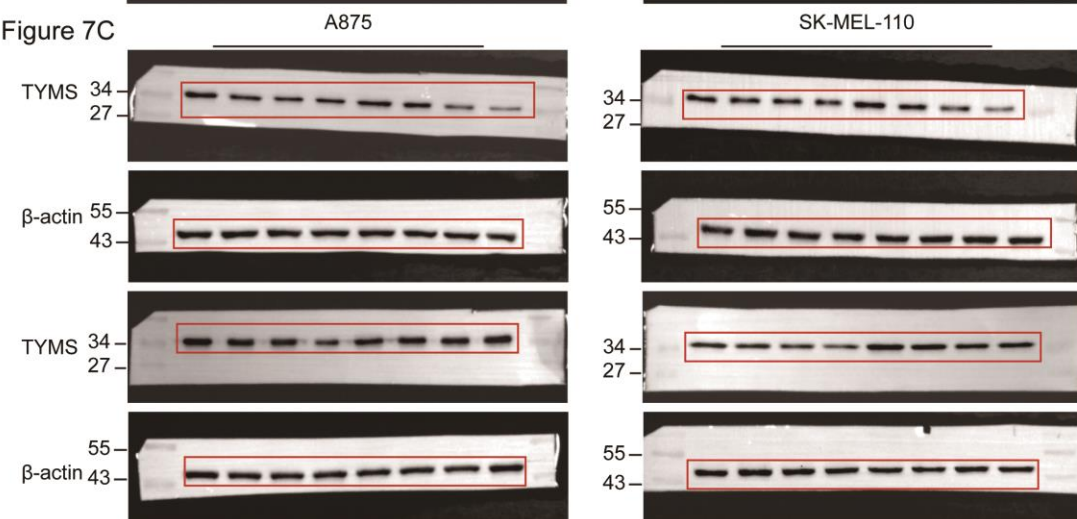

Figure 7D

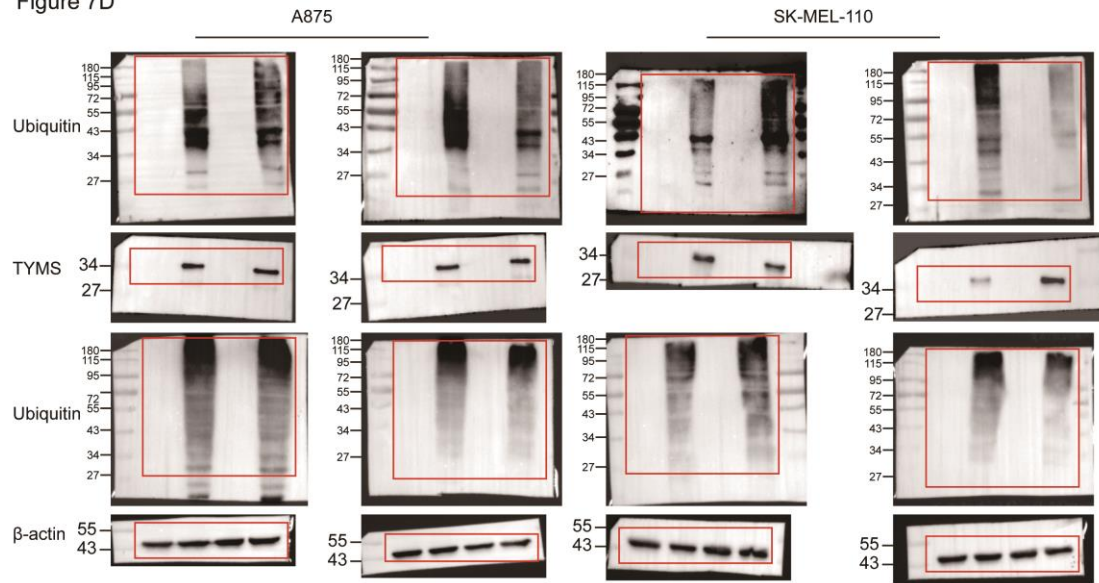

Figure 7E

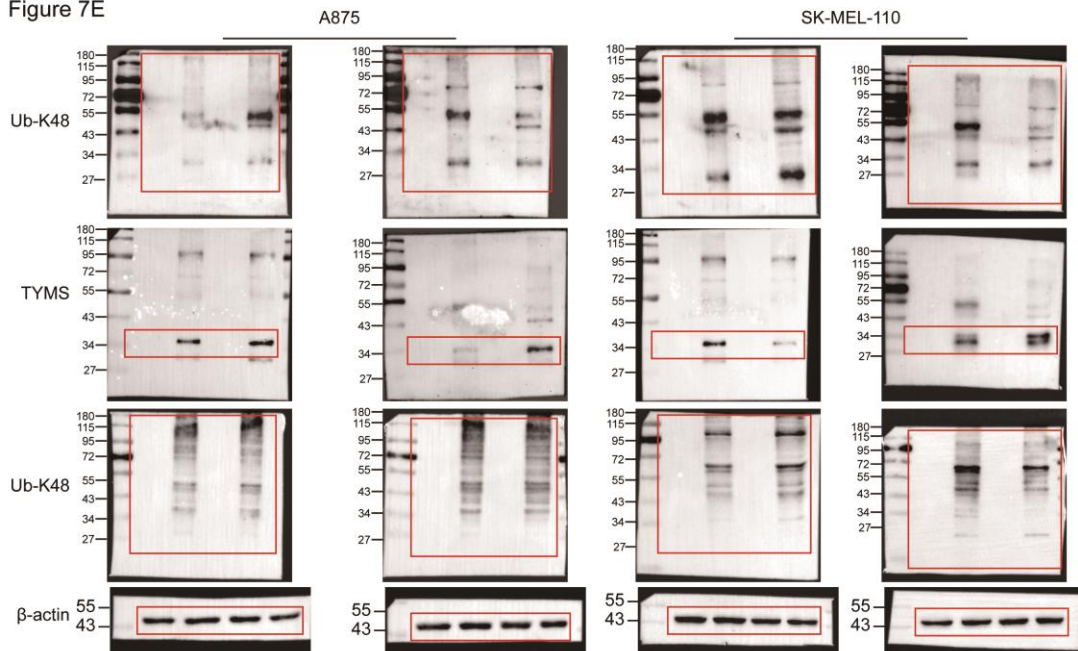

Figure 7F

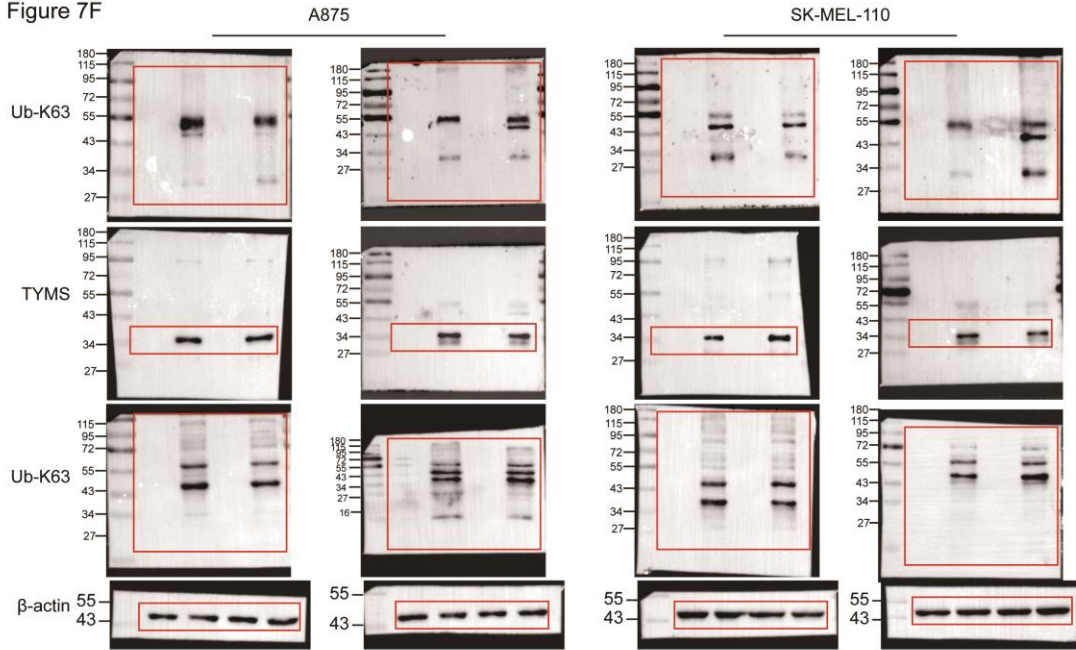

Figure 8C

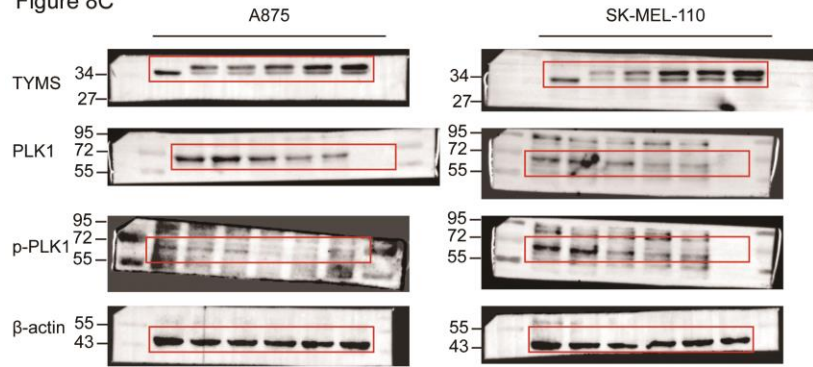

Figure 8F

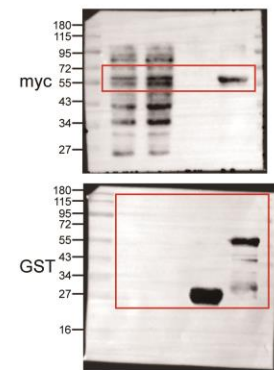

Figure 8E

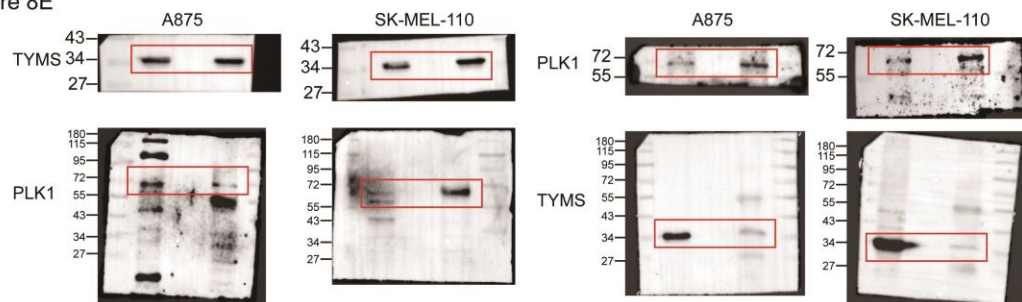

Supplementary Figure 1D

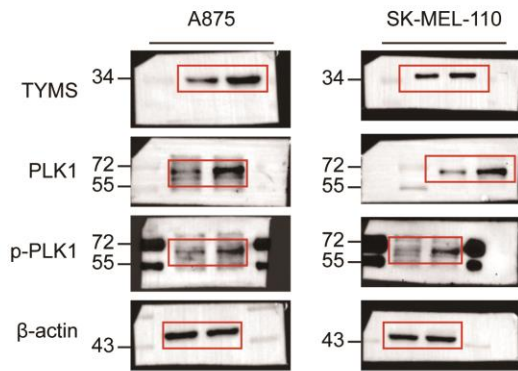

Supplementary Figure 1E

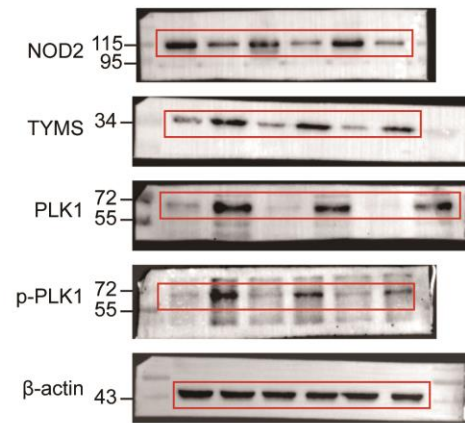

Supplementary Figure 2A

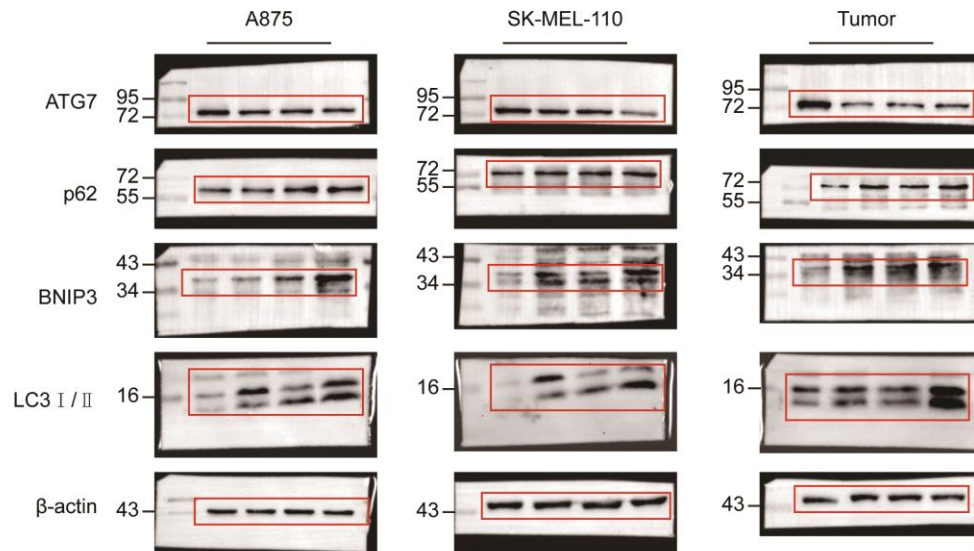

Supplement: 41419_2024_7104_MOESM6_ESM.pdf [file 41419_2024_7104_MOESM6_ESM.pdf]
